# Supplementary material for: Enhancement of SARS-CoV-2 mRNA Vaccine Efficacy through the Application of TMSB10 UTR for Superior Antigen Presentation and Immune Activation
Source: Preprints.org preprint supplement (doi:10.20944/preprints202403.0242.v1), 2024-03-05
Supplement: Supplementary file 1 [file supplementary]

## Sheet: Sheet1
Table 1	The sequences utilized in this article are as follows
Gene name	Access number	5'UTR	3'UTR
TMSB10	NM_021103.4	GTTTCTTGCTGCAGCAACGCGAGTGGGAGCACCAGGATCTCGGGCTCGGAACGAGACTGCACGGATTGTTTTAAGAAA	GATCCTGGAGGATTTCCTACCCCCGTCCTCTTCGAGACCCCAGTCGTGATGTGGAGGAAGAGCCACC TGCAAGATGGACACGAGCCACAAGCTGCACTGTGAACCTGGGCACTCCGCGCCGATGCCACCGGCCTGTG GGTCTCTGAAGGGACCCCCCCCCAATCGGACTGCCAAATTCTCCGGTTTGCCCCGGGATATTATAGAAAA TTATTTGTATGAATAATGAAAATAAAACACACCTCGTGGCA
ACTB	NM_001101.5	ACCGCCGAGACCGCGTCCGCCCCGCGAGCACAGAGCCTCGCCTTTGCCGATCCGCCGCCCGTCCACACCC	GCGGACTATGACTTAGTTGCGTTACACCCTTTCTTGACAAAACCTAAC TTGCGCAGAAAACAAGATGAGATTGGCATGGCTTTATTTGTTTTTTTTGTTTTGTTTTGGTTTTTTTTTT TTTTTTGGCTTGACTCAGGATTTAAAAACTGGAACGGTGAAGGTGACAGCAGTCGGTTGGAGCGAGCATC CCCCAAAGTTCACAATGTGGCCGAGGACTTTGATTGCACATTGTTGTTTTTTTAATAGTCATTCCAAATA TGAGATGCGTTGTTACAGGAAGTCCCTTGCCATCCTAAAAGCCACCCCACTTCTCTCTAAGGAGAATGGC CCAGTCCTCTCCCAAGTCCACACAGGGGAGGTGATAGCATTGCTTTCGTGTAAATTATGTAATGCA…
TMSB4X	NM_021109.4	AACTCGGTGGTGGCCACTGCGCAGACCAGACTTCGCTCGTACTCGTGCGCCTCGCTTCGCTTTTCCTCCG CAACC	TGAGGCGTGCGCCGCCAATATGCACTGTACATTCCACAAGCATTGCCTTCTTATTTTACTTCTTTTAGCT GTTTAACTTTGTAAGATGCAAAGAGGTTGGATCAAGTTTAAATGACTGTGCTGCCCCTTTCACATCAAAG AACTACTGACAACGAAGGCCGCGCCTGCCTTTCCCATCTGTCTATCTATCTGGCTGGCAGGGAAGGAAAG AACTTGCATGTTGGTGAAGGAAGAAGTGGGGTGGAAGAAGTGGGGTGGGACGACAGTGAAATCTAGAGTA AAACCAAGCTGGCCCAAGGTGTCCTGCAGGCTGTAATGCAGTTTAATCAGAGTGCCATTTTTTTTTTTGT TCAAATGATTTTAATTATTGGAATGCACAATTTTTTTAATATGC…
B2M	NM_004048.4	ATTCCTGAAGCTGACAGCATTCGGGCCGAG	GCAGCATCATGGAGGTTTGAAGATGCCGCATTTGGATTGGATGAATTCCAAATTCTGCTTGCTTGCTTTTTAATATTGATATGCTTATACACTTACACTT TATGCACAAAATGTAGGGTTATAATAATGTTAACATGGACATGATCTTCTTTATAATTCTACTTTGAGTG CTGTCTCCATGTTTGATGTATCTGAGCAGGTTGCTCCACAGGTAGCTCTAGGAGGGCTGGCAACTTAGAG GTGGGGAGCAGAGAATTCTCTTATCCAACATCAACATCTTGGTCAGATTTGAACTCTTCAATCTCTTGCA CTCAAAGCTTGTTAAGATAGTTAAGCGTGCATAAGTTAACTTCCAATTTACATACTCTGCTTAGAATTTG GGGGAAAATTTAGA…
MTRNRIR2	NM_001190470.2	TAATACGACTCACTATAGGGGACAACCTTAACCAAACCATTTACTCAAATAAAGTATAGGCGATAGAAATTGTAAACCGGCGCAATAGATATAGTACCGCAAGGGAAAGATGAAAAATTATAACCAAGCATAATATAGCAAGGACTAACCCCTGTACCTTCTGCATAATGAATTAACTAGAAATAACTTTGCAAAGAGAACCAAAGCTAAGACCCCCGAAACCAGACGAGCTACCTAAGAACAGCTAAAAGAGCATACCCGTCTATGTAGCAAAATAGTGGGAAGATTCATAGGTAGAGGCGACAAACCTACCGAGTCTGGTGATAGCTGGTTGTCCAAGATAGAATCTTAGTTCAACTTTAAATTTACCCACAGAACCCTCCAAATCCCCCTGTAAAT…	TTGTGTATGCGTTAATAAAAAGAAGGAACTCGTA (use the R27 3'UTR)
HLA-DRA	NM_019111.5	ATTCTTGTCTGTTCTGCCTCACTCCCGAGCTCTACTGACTCCCAACAGAGCGCCCAAGAAGAAA	GTGATGGTGTTTCTTAGAGAGAAGATCACTGAAGAAACTTCTGCTTTAATGGCTTTACAAAGCTGGCAAT ATTACAATCCTTGACCTCAGTGAAAGCAGTCATCTTCAGCATTTTCCAGCCCTATAGCCACCCCAAGTGT GGATATGCCTCTTCGATTGCTCCGTACTCTAACATCTAGCTGGCTTCCCTGTCTATTGCCTTTTCCTGTA TCTATTTTCCTCTATTTCCTATCATTTTATTATCACCATGCAATGCCTCTGGAATAAAACATACAGGAGT CTGTCTCTGCTATGGAATGCCCCATGGGGCATCTCTTGTGTACTTATTGTTTAAGGTTTCCTCAAACTGT GATTTTTCTGAACACAATAAACTATTTTGATGATCTTGGGTGGAA
HLA-DRB1	NM_002124.4	AGTAACTTCCTCCCTATAACTTGGAATGTGGGTGGAGGGGTTCATAGTTCTCCCTGAGTGAGACTTGCCT GCTTCTCTGGCCCCTGGTCCTGTCCTGTTCTCCAGC	AATGCAGATGACCACATTCAAGGAAGAACTTTCTGCCCCGGCTTTGCAGGATGAAAAGCTTTCCTGCTTGGCA GTTATTCTTCCACAAGAGAGGGCTTTCTCAGGACCTGGTTGCTACTGGTTCGGCAACTGCAGAAAATGTC CTCCCTTGTGGCTTCCTCAGCTCCTGCCCTTGGCCTGAAGTCCCAGCATTGATGGCAGCGCCTCATCTTC AACTTTTGTGCTCCCCTTTGCCTAAACCGTATGGCCTCCCGTGCATCTGTATTCACCCTGTATGACAAAC ACATTACATTATTAAATGTTTCTCAAAGATGGA
FTL	NM_000146.4	GCAGTTCGGCGGTCCCGCGGGTCTGTCTCTTGCTTCAACAGTGTTTGGACGGAACAGATCCGGGGACTCT CTTCCAGCCTCCGACCGCCCTCCGATTTCCTCTCCGCTTGCAACCTCCGGGACCATCTTCTCGGCCATCT CCTGCTTCTGGGACCTGCCAGCACCGTTTTTGTGGTTAGCTCCTTCTTGCCAACCAACC	GAGCCTTCTGAGCCCAGCGACTTCTGAAGGGCCCCTTGCAAAG TAATAGGGCTTCTGCCTAAGCCTCTCCCTCCAGCCAATAGGCAGCTTTCTTAACTATCCTAACAAGCCTT GGACCAAATGGAAATAAAGCTTTTTGATGCA
FTH1	NM_002032.3	GCCAGACGTTCTTCGCCGAGAGTCGTCGGGGTTTCCTGCTTCAACAGTGCTTGGACGGAACCCGGCGCTC GTTCCCCACCCCGGCCGGCCGCCCATAGCCAGCCCTCCGTCACCTCTTCACCGCACCCTCGGACTGCCCC AAGGCCCCCGCCGCCGCTCCAGCGCCGCGCAGCCACCGCCGCCGCCGCCGCCTCTCCTTAGTCGCCGCC	GCCTCGGGC TAATTTCCCCATAGCCGTGGGGTGACTTCCCTGGTCACCAAGGCAGTGCATGCATGTTGGGGTTTCCTTT ACCTTTTCTATAAGTTGTACCAAAACATCCACTTAAGTTCTTTGATTTGTACCATTCCTTCAAATAAAGA AATTTGGTACCCAGGTGTTGTCTTTGAGGTCTTGGGATGAATCAGAAATCTATCCAGGCTATCTTCCAGA TTCCTTAAGTGCCGTTGTTCAGTTCTAATCACACTAATCAAAAAGAAACGAGTATTTGTATTTATTAAAC TCATTAGTTTGGGCAGTATACTAAGGTGTGGCTGTCTTGGATTCAGATAGAACTAAGGGTTCCCGACTCT GAATCCAGAGTCTGAGTTAAATGTTTCCAATGGT…
R27		ATCCGCCATCGTGGGTGAGTGTATGCTCTGTGGCCGCGCTCTGGCTAGTGGCGCTACGCGTCGCTCTCACGGGTGTCGTCGGATCTAATCCGTCTCTTTTCGAATGCAGGTGGAGCCGCCGCCACG	TTGTGTATGCGTTAATAAAAAGAAGGAACTCGTA
